Correction

# Correction: Exploring the Conformational Transitions of Biomolecular Systems Using a Simple Two-State Anisotropic Network Model

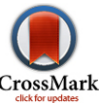

**The PLOS Computational Biology Staff**

In the Author Contributions section, Avisek Das, Mert Gur and Mary Hongying Cheng are listed as having contributed equally to this work. Only Mert Gur and Mary Hongying Cheng contributed equally.

## Reference

1. Das A, Gur M, Cheng MH, Jo S, Bahar I, et al. (2014) Exploring the Conformational Transitions of Biomolecular Systems Using a Simple Two-State Anisotropic Network Model. PLoS Comput Biol 10(4): e1003521. doi:10.1371/journal.pcbi.1003521

**Citation:** The PLOS Computational Biology Staff (2014) Correction: Exploring the Conformational Transitions of Biomolecular Systems Using a Simple Two-State Anisotropic Network Model. PLoS Comput Biol 10(8): e1003868. doi:10.1371/journal.pcbi.1003868

**Published:** August 29, 2014

**Copyright:** © 2014 The PLOS Computational Biology Staff. This is an open-access article distributed under the terms of the Creative Commons Attribution License, which permits unrestricted use, distribution, and reproduction in any medium, provided the original author and source are credited.
